# Supplementary material for: Thermal evaporation-induced anhydrous synthesis of Fe3O4–graphene composite with enhanced rate performance and cyclic stability for lithium ion batteries
Source: Royal Society of Chemistry journal article supplement (doi:10.1039/c3cp50588j), 2013-01-01
Supplement: c3cp50588j.pdf [file c3cp50588j.pdf]

Electronic Supplementary Information (ESI) for

**Thermal evaporation-induced anhydrous synthesis of Fe<sub>3</sub>O<sub>4</sub>-  
graphene composite with enhanced rate performance and  
cyclic stability for lithium ion batteries**

*Yucheng Dong,<sup>a,b</sup> Ruguang Ma,<sup>b</sup> Mingjun Hu,<sup>b</sup> Hua Cheng,<sup>b</sup> Qingdan Yang,<sup>a,b</sup> Yang Yang Li,<sup>a</sup> Juan Antonio Zapien<sup>a,b\*</sup>*

*<sup>a</sup>Department of Physics and Materials Science, City University of Hong Kong, Hong Kong SAR, PR China*

*<sup>b</sup>Center of Super-Diamond and Advanced Films (COSDAF), City University of Hong Kong, Hong Kong SAR, PR China*

\*Corresponding author. Tel: +852 34427823. E-mail address: apjazz@cityu.edu.hk (J.A. Zapien).

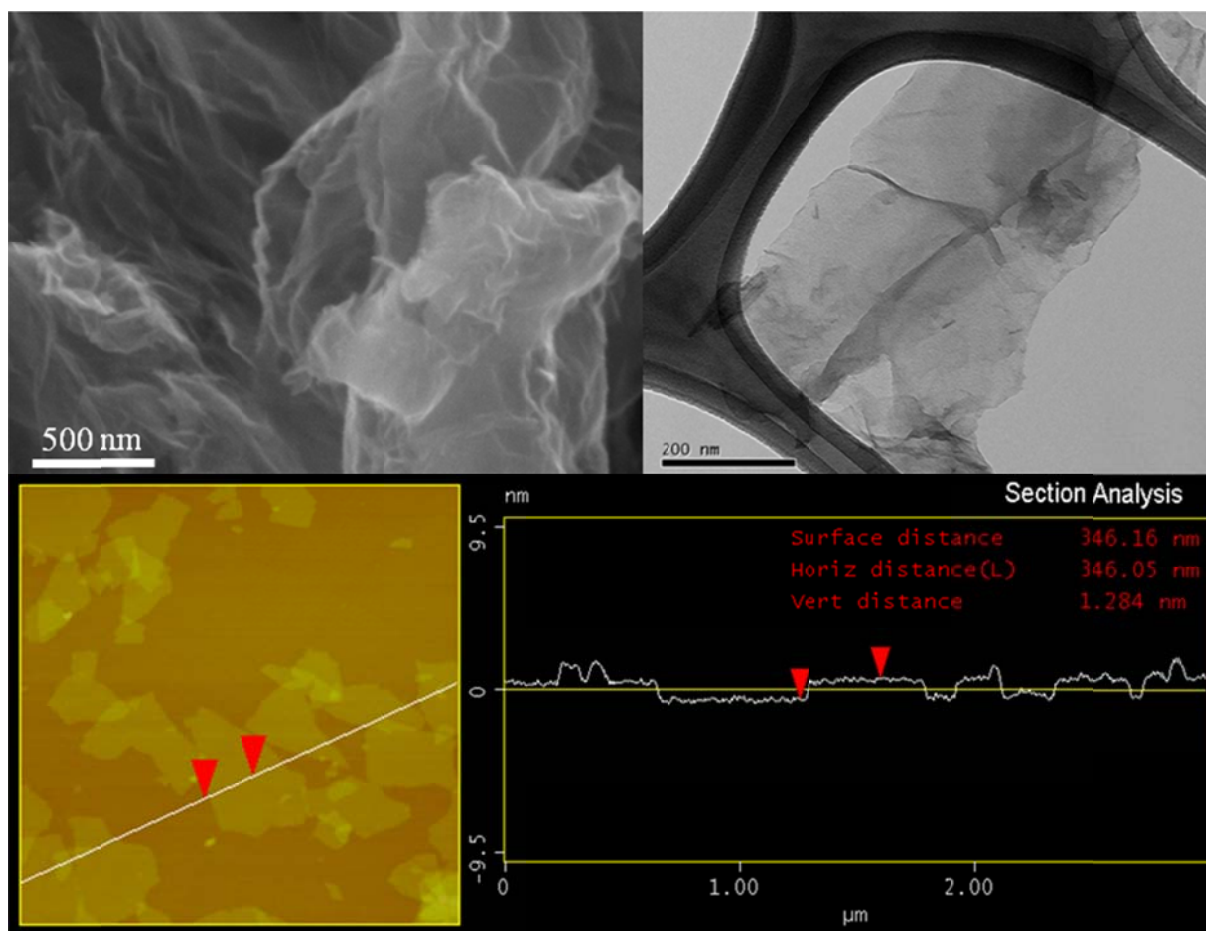

Fig. S1 SEM, TEM and AFM images of GO.

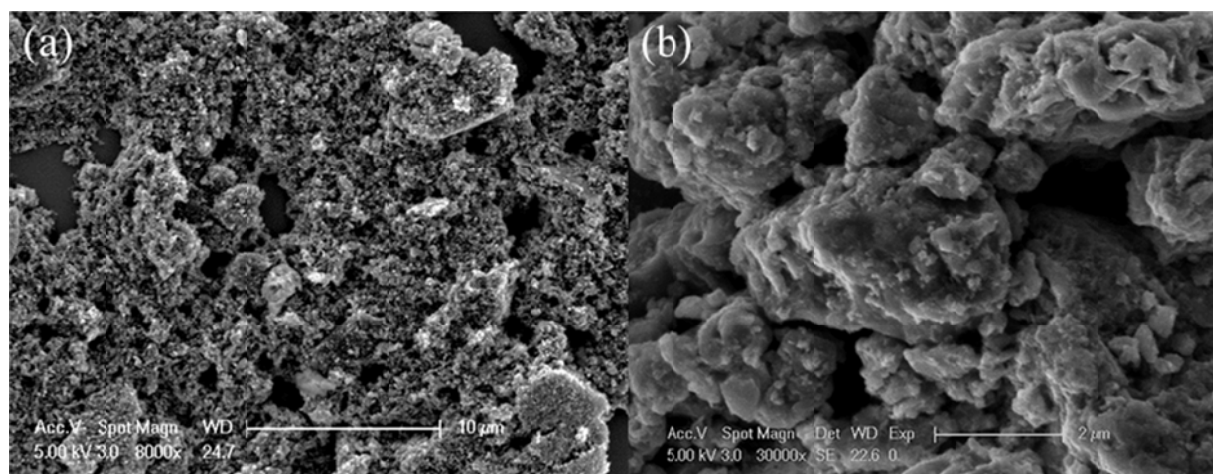

Fig. S2 SEM images of  $\text{Fe}_3\text{O}_4$ -graphene composite with different magnification.

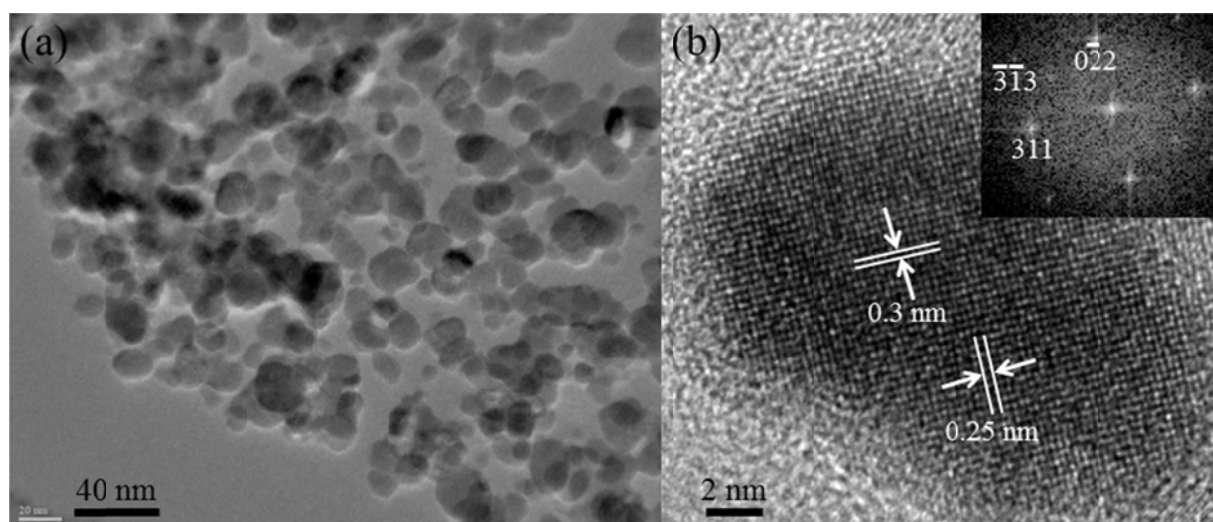

Fig. S3 TEM (a) and HRTEM (b) image of  $\text{Fe}_3\text{O}_4$ . The corresponding Fourier transform of the high-resolution image is shown in the inset of (b).

The TEM image of  $\text{Fe}_3\text{O}_4$  in Fig. S3 (a) revealed the size distribution of these particles to be in the 5 to 20 nm. The HRTEM image of an individual  $\text{Fe}_3\text{O}_4$  nanoparticle is shown in Fig S3 (b) and the inset shows the corresponding Fourier transform image. The lattice spacing are 0.3 and 0.25 nm which are in good agreement with the d-spacing of  $(0\bar{2}2)$  and  $(311)$  planes, respectively.
